# Supplementary material
Source: publisher figshare collection journal article supplement (https://frontiersin.figshare.com/ndownloader/files/13673402)
Supplement: Supplementary file [file 13673402]

## Supplementary Tables

**Table S1.** Description of classification features

|    | Name of the feature | Description                                                                                                                                   | Reference                     |
|----|---------------------|-----------------------------------------------------------------------------------------------------------------------------------------------|-------------------------------|
| 1  | Grantham            | Grantham score of substitutions                                                                                                               | (Grantham, 1974)              |
| 2  | Sneath              | Sneath score of substitutions                                                                                                                 | (Sneath, 1966)                |
| 3  | Epstein             | Epstein score of substitutions                                                                                                                | (EPSTEIN, 1967)               |
| 4  | Miyata              | Miyata score of substitutions                                                                                                                 | (Miyata et al., 1979)         |
| 5  | Blo62               | BLOSUM62 score of substitutions                                                                                                               | (Henikoff and Henikoff, 1992) |
| 6  | pph2_Score1         | PSIC score for wild type amino acid residues                                                                                                  | (Adzhubei et al., 2010)       |
| 7  | pph2_dScore         | difference of PSIC scores for two amino acid residue variants                                                                                 |                               |
| 8  | pph2_IdPmax         | Maximum congruency of the mutant amino acid residue to all sequences in multiple alignment                                                    |                               |
| 9  | pph2_IdQmin         | Query sequence identity with the closest homologue deviating from the wild type amino acid residue                                            |                               |
| 10 | pph2_Nobs           | Number of residues observed at the substitution position in multiple alignment (without gaps)                                                 |                               |
| 11 | helix               | Binary variable: whether or not a substitution locates within the helix of the secondary structure predicted by PfamScan                      | (Finn et al., 2014)           |
| 12 | strand              | Binary variable: whether or not a substitution locates within a strand of the secondary structure predicted by PfamScan                       |                               |
| 13 | E_dist              | PCI-SS score for $\beta$ -strands                                                                                                             | (Green et al., 2009)          |
| 14 | T_dist              | PCI-SS score for non-regular structures                                                                                                       |                               |
| 15 | H_dist              | PCI-SS score for $\alpha$ -helices                                                                                                            |                               |
| 16 | Neighb1             | Mean Grantham score between the wild type amino acid residue and two neighbor amino acid residues                                             | New features                  |
| 17 | Neighb2             | Mean Grantham score between the wild type amino acid residue and two amino acid residues separated from the target by one amino acid position |                               |
| 18 | PfamHit             | Belonging to known Pfam domains                                                                                                               | (Finn et al., 2014)           |

## Supplementary Figures

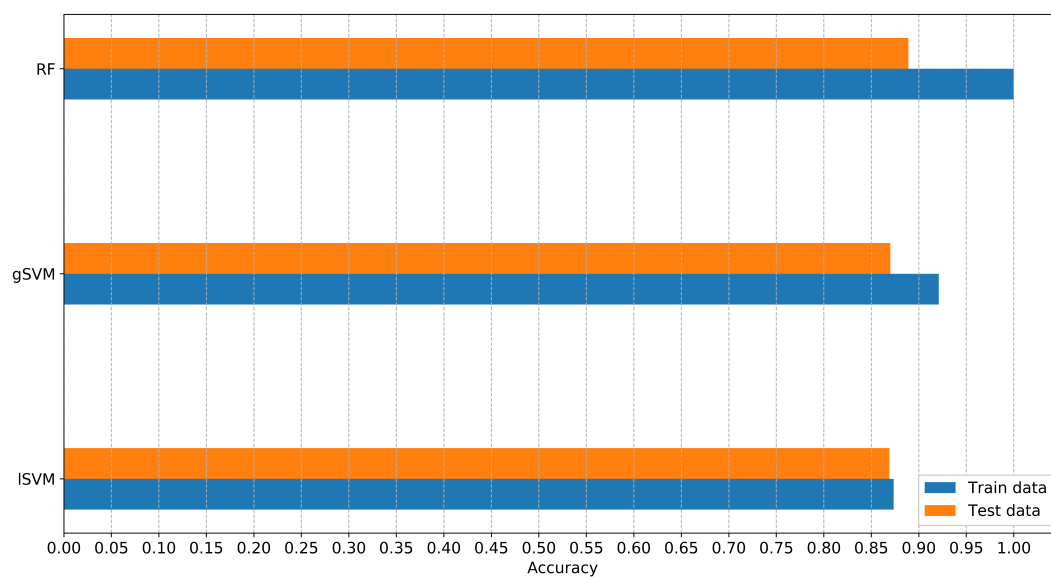

**Figure S1.** Accuracy values obtained after training and testing different classifiers on the *A. thaliana* dataset: Linear SVM (**ISVM**), Gaussian SVM (**gSVM**) and Random Forest (**RF**). Due to the comparable accuracy values calculated for train and test sets using the optimal values of hyperparameters, we concluded, that the models avoided the overfitting.

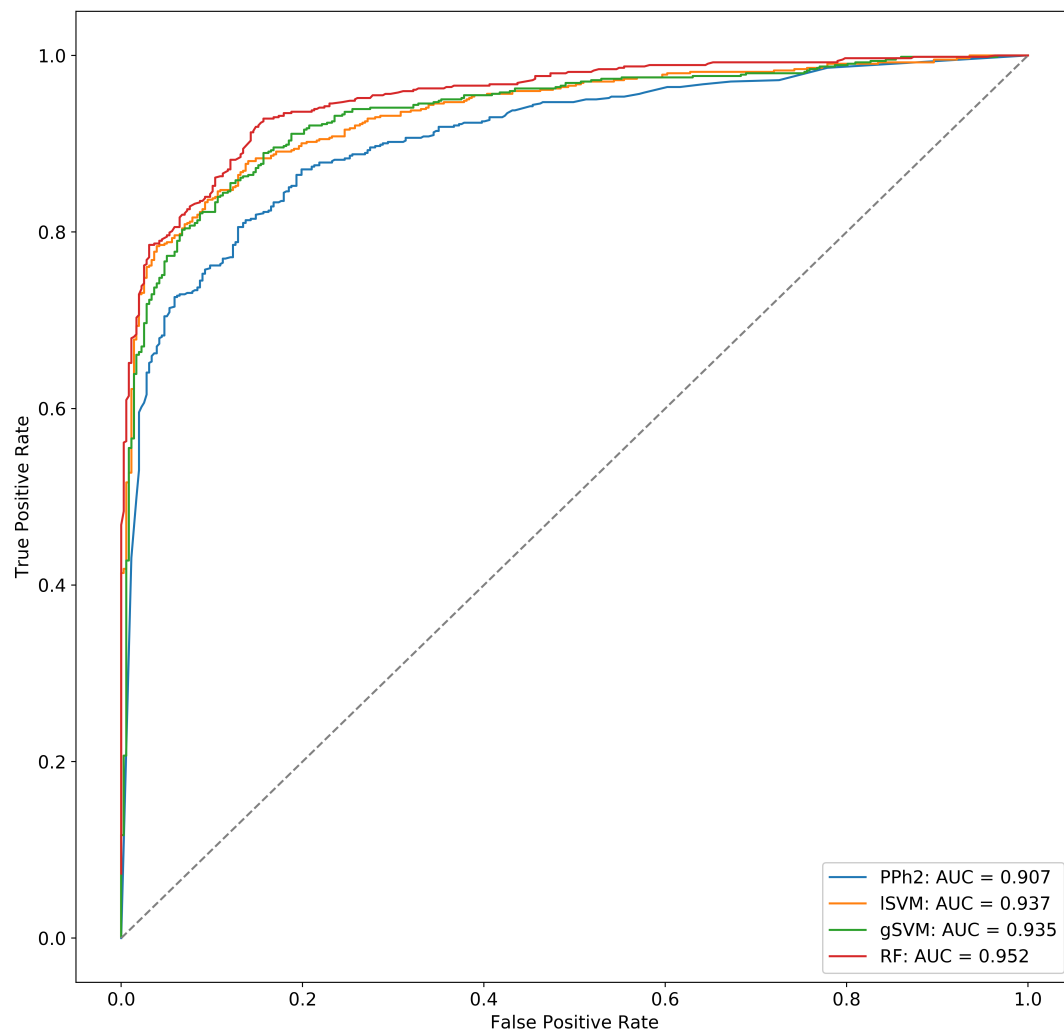

**Figure S2.** ROC-curves for PolyPhen-2 (**PPh2**), Linear SVM (**ISVM**), Gaussian SVM (**gSVM**) and Random Forest (RF), which were used for the mutation prediction of *A. thaliana* test dataset. The dashed line accounts for the ROC-curve for a random guessing. The legend contains Area Under Curve (**AUC**) values corresponding to the each classifier in question.

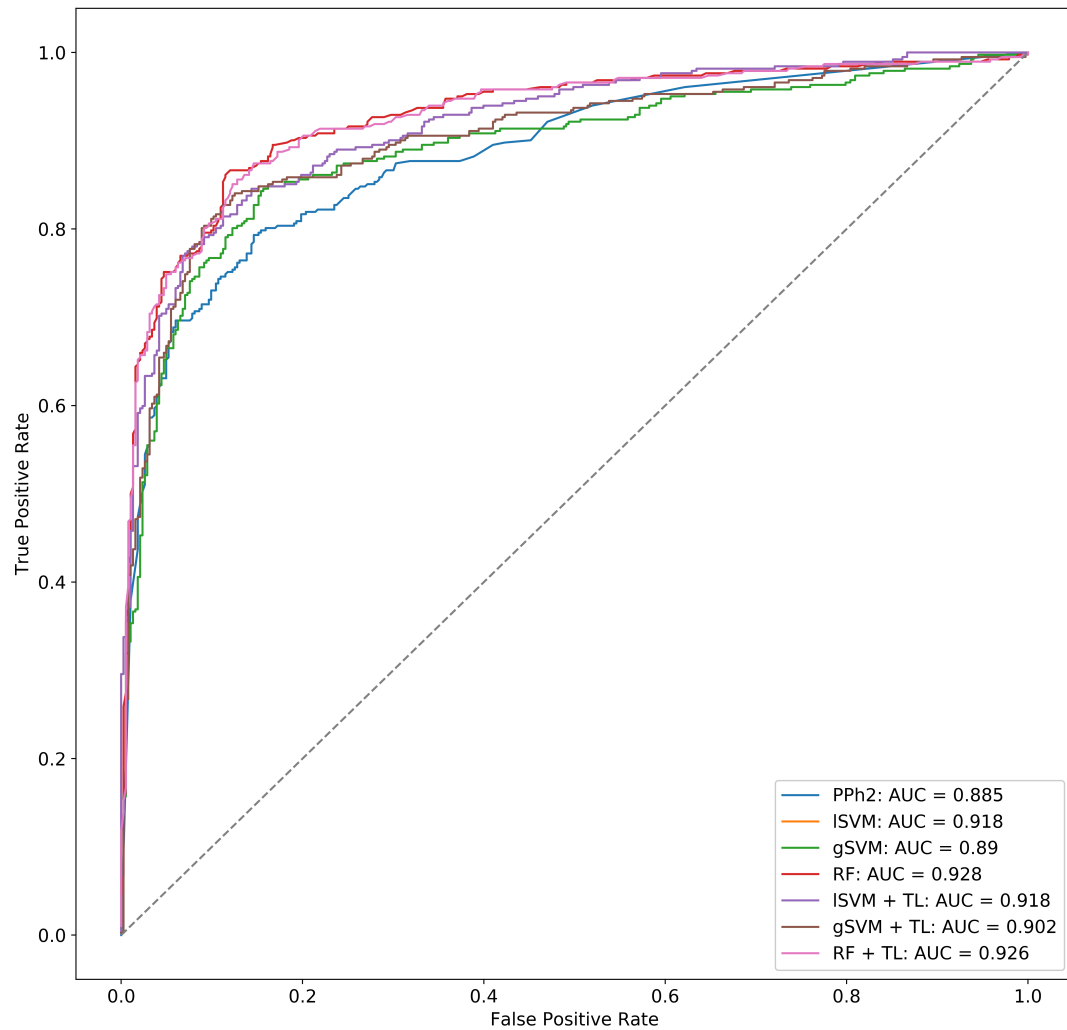

**Figure S3.** ROC-curves for PolyPhen-2 (**PPh2**), Linear SVM (**ISVM**), Gaussian SVM (**gSVM**), Random Forest (**RF**) and the last three classifiers with applying Transfer Learning (**ISVM + TL**, **gSVM + TL**, **RF + TL**, respectively), which were used for the mutation prediction of *O. sativa* data. The dashed line accounts for the ROC-curve for a random guessing. The legend contains Area Under Curve (**AUC**) values corresponding to the each classifier in question.

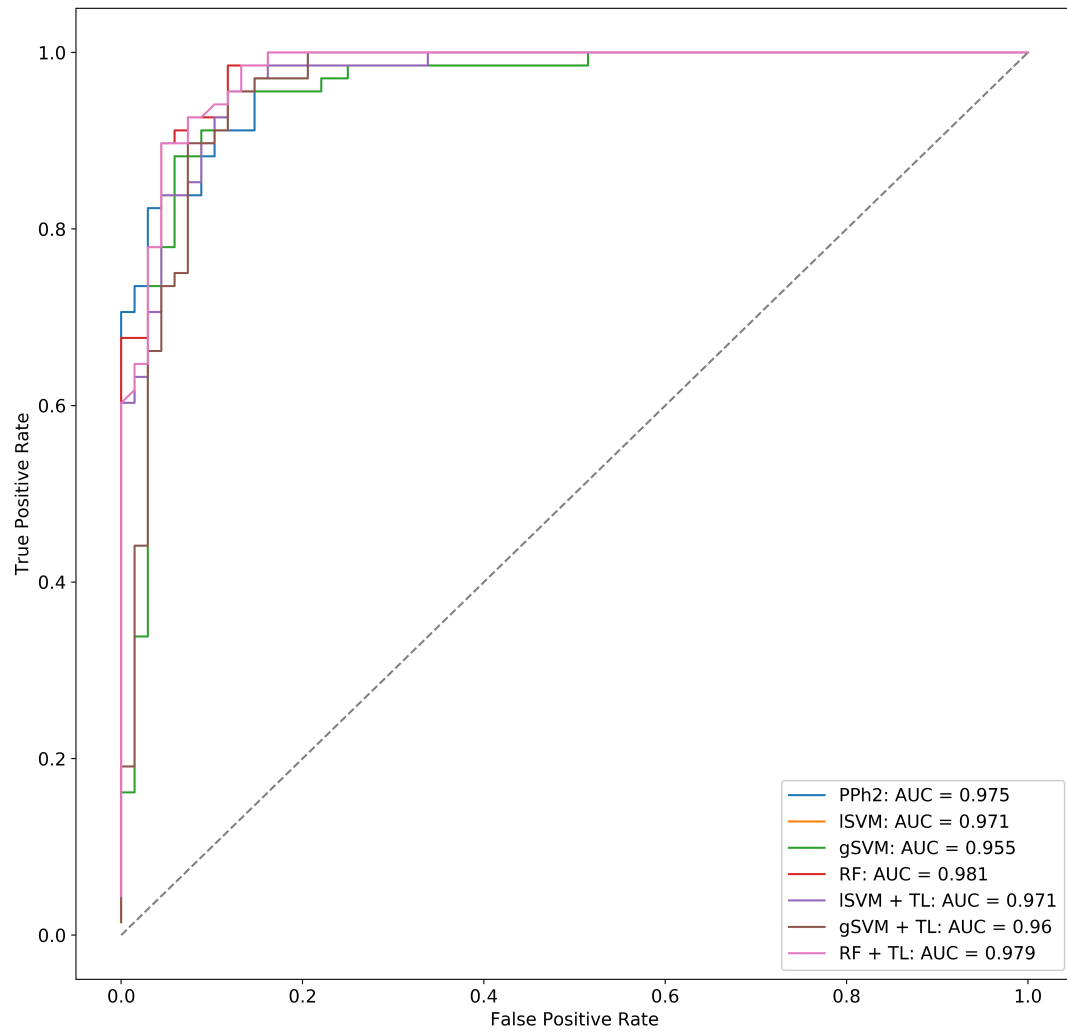

**Figure S4.** ROC-curves for PolyPhen-2 (**PPh2**), Linear SVM (**ISVM**), Gaussian SVM (**gSVM**), Random Forest (**RF**) and the last three classifiers with applying Transfer Learning (**ISVM + TL**, **gSVM + TL**, **RF + TL**, respectively), which were used for the mutation prediction of *P. sativum* data. The dashed line accounts for the ROC-curve for a random guessing. The legend contains Area Under Curve (**AUC**) values corresponding to the each classifier in question.

## References

- Adzhubei, I. A., Schmidt, S., Peshkin, L., Ramensky, V. E., Gerasimova, A., Bork, P., et al. (2010). A method and server for predicting damaging missense mutations. *Nat. Methods* 7, 248–249. doi:10.1038/nmeth0410-248.
- EPSTEIN, C. J. (1967). Non-randomness of Amino-acid Changes in the Evolution of Homologous Proteins. *Nature* 215, 355–359. doi:10.1038/215355a0.
- Finn, R. D., Bateman, A., Clements, J., Coggill, P., Eberhardt, R. Y., Eddy, S. R., et al. (2014). Pfam: the protein families database. *Nucleic Acids Res.* 42, D222–D230. doi:10.1093/nar/gkt1223.
- Grantham, R. (1974). Amino acid difference formula to help explain protein evolution. *Science* 185, 862–4.
- Green, J. R., Korenberg, M. J., and Aboul-Magd, M. O. (2009). PCI-SS: MISO dynamic nonlinear protein secondary structure prediction. *BMC Bioinformatics* 10, 222. doi:10.1186/1471-2105-10-222.
- Henikoff, S., and Henikoff, J. G. (1992). Amino acid substitution matrices from protein blocks. *Proc. Natl. Acad. Sci.* 89, 10915–10919. doi:10.1073/pnas.89.22.10915.
- Miyata, T., Miyazawa, S., and Yasunaga, T. (1979). Two types of amino acid substitutions in protein evolution. *J. Mol. Evol.* 12, 219–236. doi:10.1007/BF01732340.
- Sneath, P. H. (1966). Relations between chemical structure and biological activity in peptides. *J. Theor. Biol.* 12, 157–95. doi:4291386.
